# Supplementary material for: Proton conduction in two hydrogen-bonded supramolecular lanthanide complexes
Source: Royal Society of Chemistry journal article supplement (doi:10.1039/d0nj02085k), 2020-01-01
Supplement: d0nj02085k1.pdf [file d0nj02085k1.pdf]

## Supporting information

### Proton conduction in two hydrogen-bonded supramolecular lanthanide-complexes

Zhi-Qiang Shi<sup>\*a</sup>, Ning-Ning Ji<sup>a</sup>, Wan-Yao Chen<sup>b</sup>, and Gang Li<sup>b</sup>

<sup>a</sup>College of Chemistry and Chemical Engineering, Taishan University, Taian 271021, P. R. China

<sup>b</sup>College of Chemistry and Green Catalysis Centre, Zhengzhou University, Zhengzhou 450001, P. R. China

**Table S1** Selected Bond Lengths (Å) and Angles (deg) for **1**

|                  |            |                   |            |
|------------------|------------|-------------------|------------|
| Eu(1)-O(1)       | 2.444(4)   | Eu(1)-O(15)       | 2.465(4)   |
| Eu(1)-O(5)       | 2.300(3)   | Eu(1)-O(16)       | 2.412(4)   |
| Eu(1)-O(13)      | 2.384(4)   | Eu(1)-O(17)       | 2.396(4)   |
| Eu(1)-O(14)      | 2.424(4)   | Eu(1)-O(18)       | 2.390(5)   |
| O(1)-Eu(1)-O(15) | 128.51(14) | O(14)-Eu(1)-O(1)  | 133.94(14) |
| O(5)-Eu(1)-O(1)  | 142.79(13) | O(14)-Eu(1)-O(15) | 75.47(16)  |
| O(5)-Eu(1)-O(13) | 140.48(15) | O(16)-Eu(1)-O(1)  | 74.05(13)  |
| O(5)-Eu(1)-O(14) | 75.95(15)  | O(16)-Eu(1)-O(14) | 69.10(15)  |
| O(5)-Eu(1)-O(15) | 73.19(14)  | O(16)-Eu(1)-O(15) | 142.99(14) |
| O(5)-Eu(1)-O(16) | 107.19(14) | O(17)-Eu(1)-O(1)  | 71.99(13)  |
| O(5)-Eu(1)-O(17) | 71.54(14)  | O(17)-Eu(1)-O(14) | 126.36(17) |
| O(5)-Eu(1)-O(18) | 95.57(17)  | O(17)-Eu(1)-O(15) | 130.37(15) |
| O(13)-Eu(1)-O(1) | 75.70(14)  | O(17)-Eu(1)-O(16) | 81.24(15)  |

|                   |            |                   |            |
|-------------------|------------|-------------------|------------|
| O(13)-Eu(1)-O(14) | 77.31(17)  | O(18)-Eu(1)-O(1)  | 71.07(15)  |
| O(13)-Eu(1)-O(15) | 72.29(15)  | O(18)-Eu(1)-O(14) | 145.19(18) |
| O(13)-Eu(1)-O(16) | 89.53(15)  | O(18)-Eu(1)-O(15) | 69.78(16)  |
| O(13)-Eu(1)-O(17) | 147.69(15) | O(18)-Eu(1)-O(16) | 144.07(15) |
| O(13)-Eu(1)-O(18) | 90.09(19)  | O(18)-Eu(1)-O(17) | 80.10(19)  |

**Table S2** Selected Bond Lengths (Å) and Angles (deg) for **2**

|                   |            |                   |            |
|-------------------|------------|-------------------|------------|
| Dy(1)-O(1)        | 2.341(3)   | Dy(1)-O(15)       | 2.345(3)   |
| Dy(1)-O(5)        | 2.371(3)   | Dy(1)-O(16)       | 2.418(3)   |
| Dy(1)-O(13)       | 2.363(3)   | Dy(1)-O(17)       | 2.383(3)   |
| Dy(1)-O(14)       | 2.411(3)   | Dy(1)-O(18)       | 2.348(3)   |
| O(1)-Dy(1)-O(17)  | 144.17(10) | O(15)-Dy(1)-O(16) | 77.38(13)  |
| O(1)-Dy(1)-O(18)  | 87.55(12)  | O(15)-Dy(1)-O(17) | 74.00(12)  |
| O(5)-Dy(1)-O(14)  | 76.19(10)  | O(15)-Dy(1)-O(18) | 144.57(12) |
| O(5)-Dy(1)-O(16)  | 145.85(10) | O(17)-Dy(1)-O(14) | 135.41(11) |
| O(5)-Dy(1)-O(17)  | 75.53(9)   | O(17)-Dy(1)-O(16) | 70.43(10)  |
| O(13)-Dy(1)-O(5)  | 73.40(9)   | O(18)-Dy(1)-O(5)  | 101.37(12) |
| O(13)-Dy(1)-O(14) | 73.27(10)  | O(18)-Dy(1)-O(13) | 70.23(11)  |
| O(13)-Dy(1)-O(16) | 131.87(11) | O(18)-Dy(1)-O(14) | 142.40(11) |
| O(13)-Dy(1)-O(17) | 128.57(11) | O(18)-Dy(1)-O(16) | 73.92(13)  |
| O(14)-Dy(1)-O(16) | 128.15(12) | O(18)-Dy(1)-O(17) | 77.10(12)  |
| O(15)-Dy(1)-O(5)  | 90.87(12)  | C(1)-O(1)-Dy(1)   | 144.8(3)   |
| O(15)-Dy(1)-O(13) | 145.03(11) | C(12)-O(5)-Dy(1)  | 138.9(2)   |
| O(15)-Dy(1)-O(14) | 72.70(11)  | O(1)-Dy(1)-O(14)  | 73.44(10)  |
| O(1)-Dy(1)-O(5)   | 139.86(10) | O(1)-Dy(1)-O(15)  | 104.28(11) |
| O(1)-Dy(1)-O(13)  | 73.16(10)  | O(1)-Dy(1)-O(16)  | 74.28(10)  |

**Table S3** Hydrogen bond lengths (Å) and angles (°) for **1**

| D–H...A                | d(H...A) | d(D...A)  | ∠DHA   |
|------------------------|----------|-----------|--------|
| N(4)–H(4)···O(9)#1     | 2.01     | 2.854(6)  | 166.3  |
| O(3)–H(3)···O(2)       | 1.62     | 2.436(5)  | 177.5  |
| O(7)–H(7A)···O(6)      | 1.66     | 2.470(5)  | 171.3  |
| O(13)–H(13B)···O(2)    | 1.85     | 2.680(6)  | 154.5  |
| O(14)–H(14A)···O(4)#2  | 2.14     | 2.781(6)  | 130.7  |
| O(14)–H(14B)···O(22)#3 | 1.88     | 2.706(6)  | 159.3  |
| O(15)–H(15B)···O(12)#4 | 1.91     | 2.759(6)  | 162.5  |
| O(16)–H(16A)···O(3)#2  | 1.91     | 2.818(5)  | 155.5  |
| O(16)–H(16B)···O(10)#5 | 1.89     | 2.696(6)  | 154.8  |
| O(17)–H(17A)···N(3)    | 2.19     | 2.881(6)  | 135.1  |
| O(17)–H(17B)···O(21)#4 | 1.93     | 2.746(7)  | 156.3  |
| O(18)–H(18B)···O(20)   | 1.92     | 2.703(8)  | 142.1  |
| O(18)–H(18B)···O(20A)  | 2.19     | 2.87(4)   | 131.1  |
| N(6)–H(6)···O(8)#6     | 2.01     | 2.834(6)  | 159.9  |
| O(10)–H(10A)···O(11)   | 1.54(2)  | 2.435(7)  | 172(6) |
| O(19)–H(19A)···N(5)#4  | 2.02     | 2.861(7)  | 170.1  |
| O(19)–H(19B)···O(20)#7 | 2.19     | 2.748(15) | 115.1  |
| O(20)–H(20A)···O(19)#7 | 2.10     | 2.748(15) | 131.7  |
| O(20)–H(20B)···O(4)#8  | 2.15     | 2.897(10) | 146.2  |
| O(21)–H(21A)···O(24)   | 1.98     | 2.779(13) | 155.9  |
| O(22)–H(22B)···O(6)#9  | 2.08     | 2.779(6)  | 139.0  |
| O(23)–H(23B)···O(22)   | 2.05     | 2.856(18) | 157.7  |

Symmetry codes: #1 =  $x, 1 + y, +z$ ; #2 =  $-x, -y, -z$ ; #3 =  $-1 + x, y, z$ ; #4 =  $1 - x, 1 - y, 1 - z$ ; #5 =  $1 - x, -y, 1 - z$ ; #6 =  $x, -1 + y, z$ ; #7 =  $1 - x, 1 - y, -z$ ; #8 =  $1 - x, -y, -z$ ; #9 =  $1 + x, y, z$ .

**Table S4** Hydrogen bond lengths (Å) and angles (°) for **2**

| D–H...A                | d(H...A) | d(D...A) | ∠DHA   |
|------------------------|----------|----------|--------|
| N(1)–H(1)···O(31)#1    | 2.16     | 2.897(4) | 143.5  |
| N(3)–H(3)···O(20)      | 2.09(5)  | 2.854(4) | 148(4) |
| O(3)–H(3A)···O(2)      | 1.70     | 2.512(4) | 172.6  |
| O(7)–H(7A)···O(6)      | 1.57(2)  | 2.472(4) | 173(6) |
| O(13)–H(13A)···O(25)   | 2.18     | 2.826(5) | 130.7  |
| O(13)–H(13B)···O(20)   | 1.84     | 2.659(4) | 139.0  |
| O(14)–H(14A)···O(29)#1 | 2.17     | 2.731(5) | 122.6  |

|                       |         |          |        |
|-----------------------|---------|----------|--------|
| O(14)–H(14B)…O(31)#1  | 1.92    | 2.766(4) | 166.7  |
| O(15)–H(15A)…O(23)#1  | 2.18    | 2.793(5) | 129.7  |
| O(15)–H(15B)…O(26)    | 1.93    | 2.765(5) | 153.2  |
| O(17)–H(17A)…O(24)#1  | 2.00    | 2.785(5) | 149.9  |
| O(18)–H(18A)…O(19)    | 1.97    | 2.753(5) | 147.4  |
| O(18)–H(18B)…O(30)    | 2.14    | 2.723(5) | 123.1  |
| N(6)–H(6)…O(22)#4     | 2.11    | 2.884(5) | 149.9  |
| O(10)–H(10A)…O(11)    | 1.67    | 2.492(5) | 179.0  |
| O(19)–H(19A)…O(27)#1  | 1.95    | 2.727(5) | 152.1  |
| O(19)–H(19B)…O(12)#5  | 1.94    | 2.765(5) | 163.0  |
| O(20)–H(20A)…O(21)#6  | 1.96(6) | 2.737(5) | 167(6) |
| O(20)–H(20B)…N(2)#6   | 2.08(6) | 2.893(4) | 160(5) |
| O(21)–H(21A)…O(24)    | 2.03    | 2.850(6) | 163.6  |
| O(21)–H(21B)…O(26)#1  | 2.00    | 2.843(6) | 177.8  |
| O(23)–H(23A)…O(8)#7   | 2.07    | 2.889(4) | 163.7  |
| O(23)–H(23B)…O(11)#8  | 1.94    | 2.791(4) | 166.7  |
| O(26)–H(26A)…O(12)#9  | 1.98    | 2.821(5) | 172.6  |
| O(26)–H(26B)…O(3)#10  | 2.07    | 2.843(5) | 150.7  |
| O(27)–H(27A)…O(9)#9   | 2.05    | 2.778(5) | 142.6  |
| O(27)–H(27B)…O(29)#9  | 2.09    | 2.790(6) | 139.3  |
| O(28)–H(28A)…O(19)#2  | 2.22    | 2.879(7) | 134.3  |
| O(29)–H(29A)…O(8)#7   | 1.97    | 2.787(5) | 160.3  |
| O(31)–H(31B)…O(21)#11 | 2.01    | 2.858(5) | 174.5  |

Symmetry codes: #1 =  $1 - x, 1 - y, 1 - z$ ; #2 =  $x, 3/2 - y, -1/2 + z$ ; #3 =  $1 - x, -1/2 + y, 3/2 - z$ ; #4 =  $1/2 - x, 1 - y, -1/2 + z$ ; #5 =  $x, 3/2 - y, 1/2 + z$ ; #6 =  $1 - x, 1/2 + y, 3/2 - z$ ; #7 =  $-1/2 + x, 3/2 - y, 1 - z$ ; #8 =  $1/2 - x, 1 - y, 1/2 + z$ ; #9 =  $1/2 + x, y, 1/2 - z$ ; #10 =  $1 - x, 1/2 + y, 1/2 - z$ ; #11 =  $x, 1/2 - y, -1/2 + z$ .

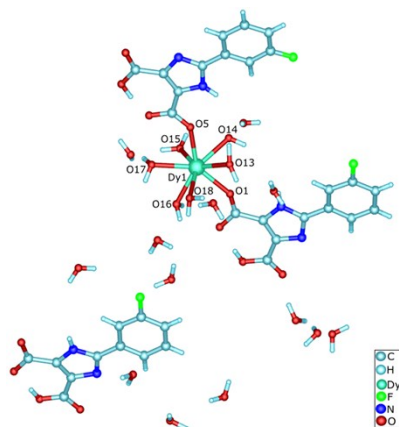

**Fig. S1** Coordination environments of Dy<sup>3+</sup> ion in **2**.

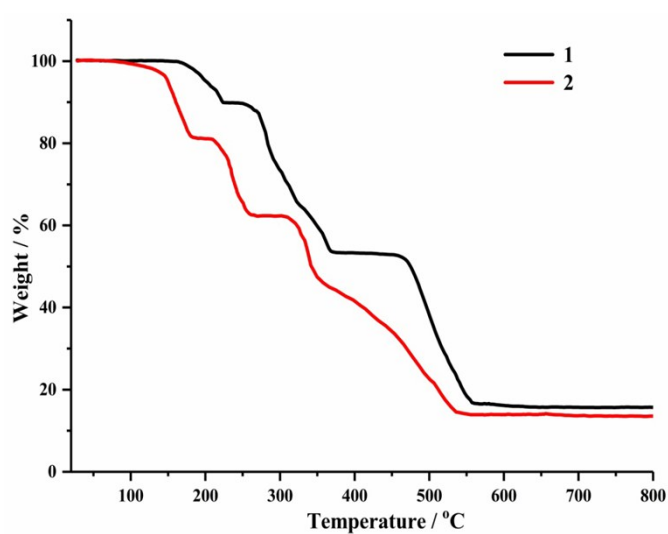

**Fig. S2** TG curves of **1** and **2**.

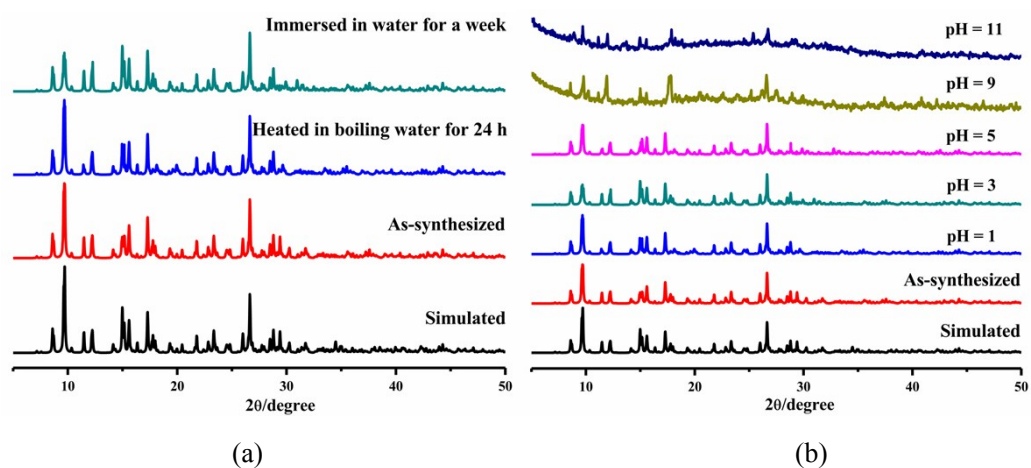

**Fig. S3.** PXRD patterns of **2** (a) simulated from the single-crystal data, as-synthesized and after water treated samples and (b) after soaked in various pH solutions.

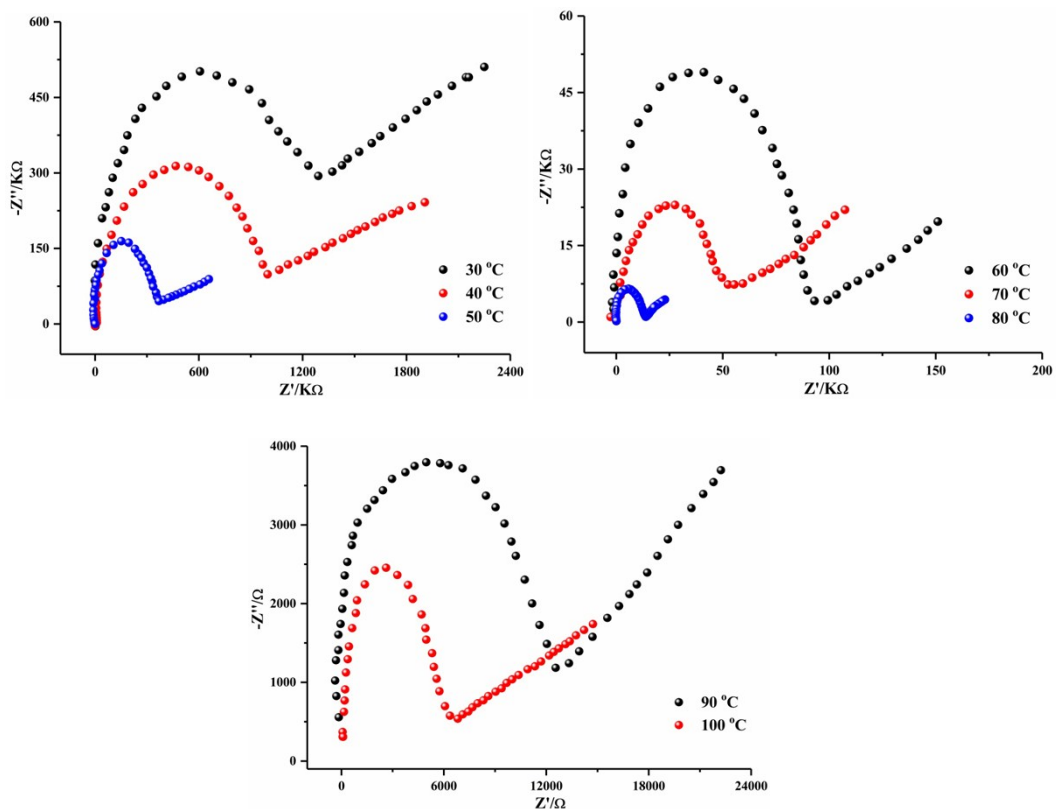

Fig. S4 Impedance spectra of **1** at 93% RH and 30-100 °C.

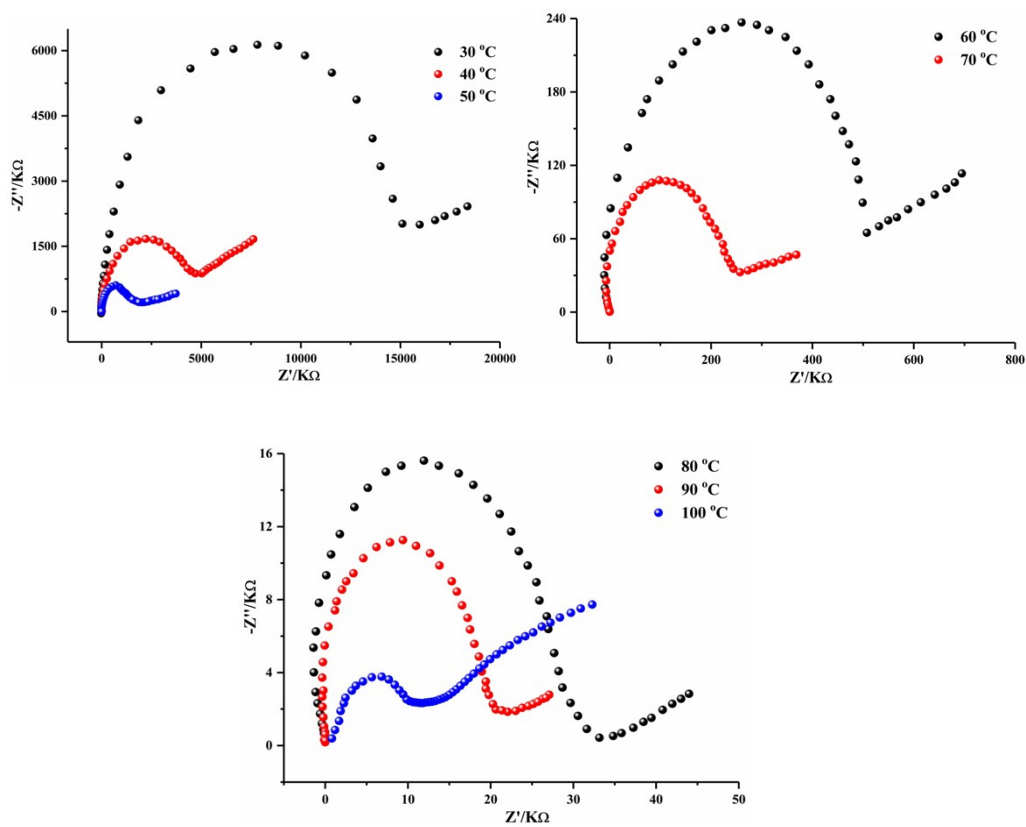

Fig. S5 Impedance spectra of **1** at 85% RH and 30-100 °C.

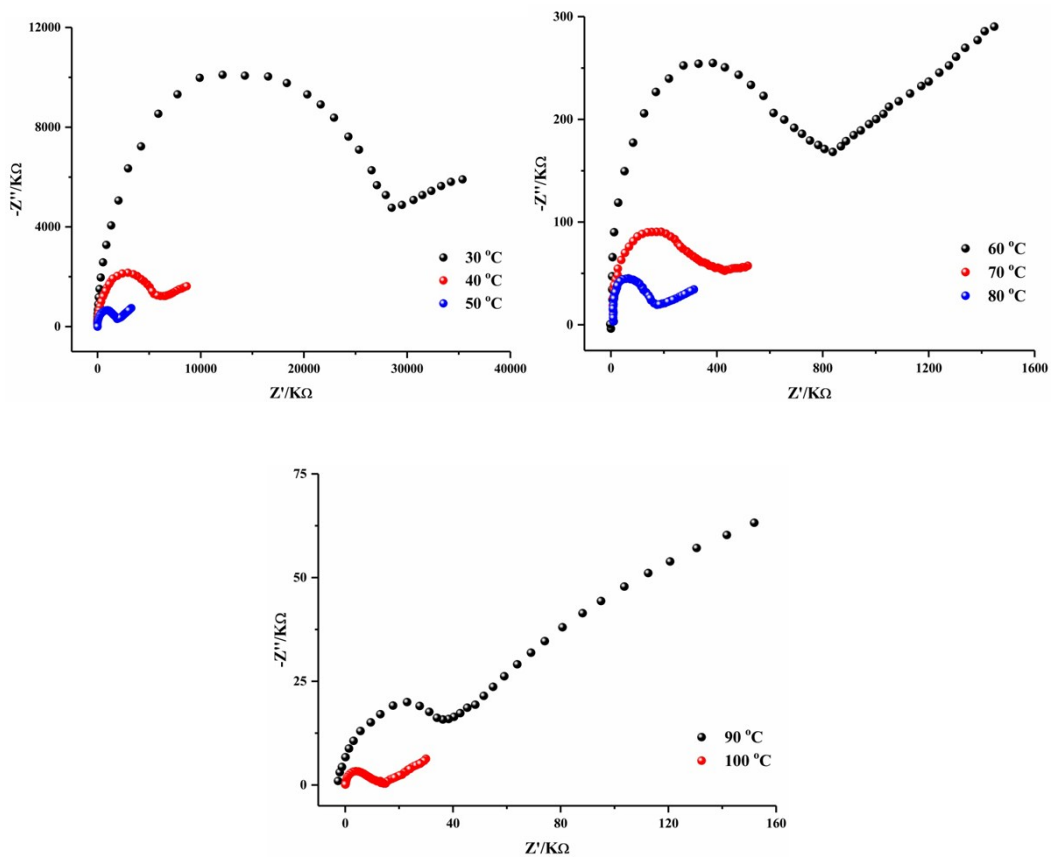

Fig. S6 Impedance spectra of **1** at 75% RH and 30-100 °C.

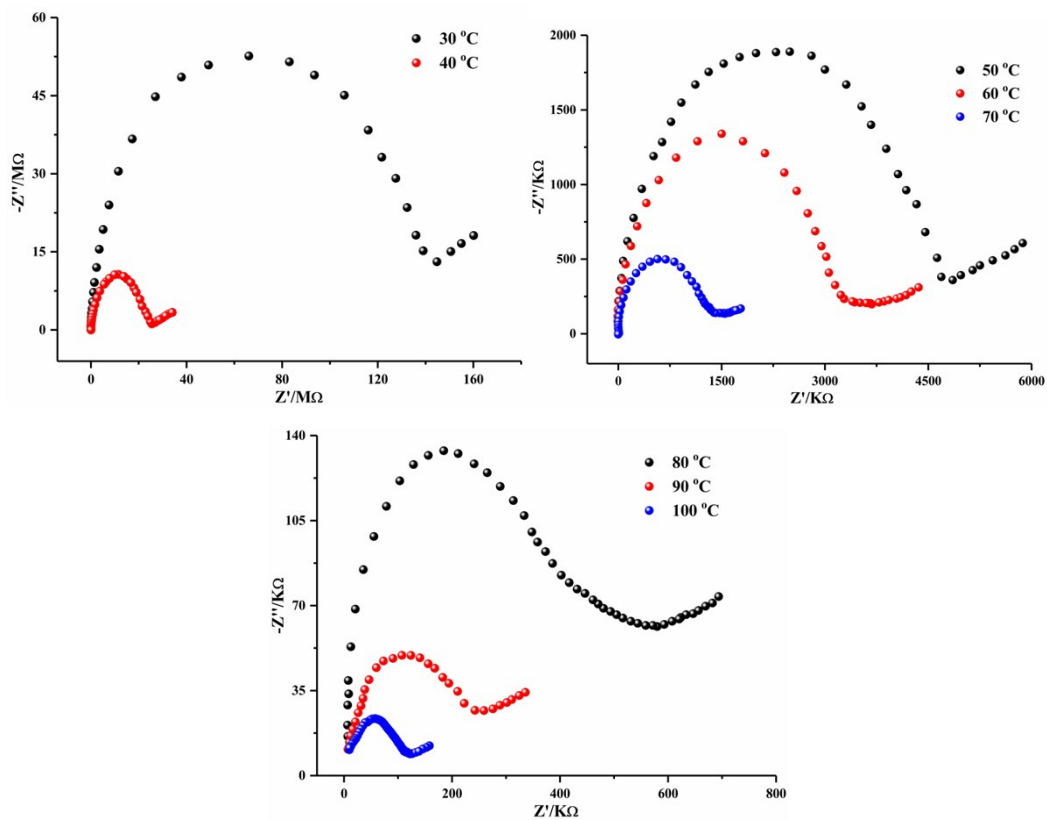

Fig. S7 Impedance spectra of **1** at 68% RH and 30-100 °C.

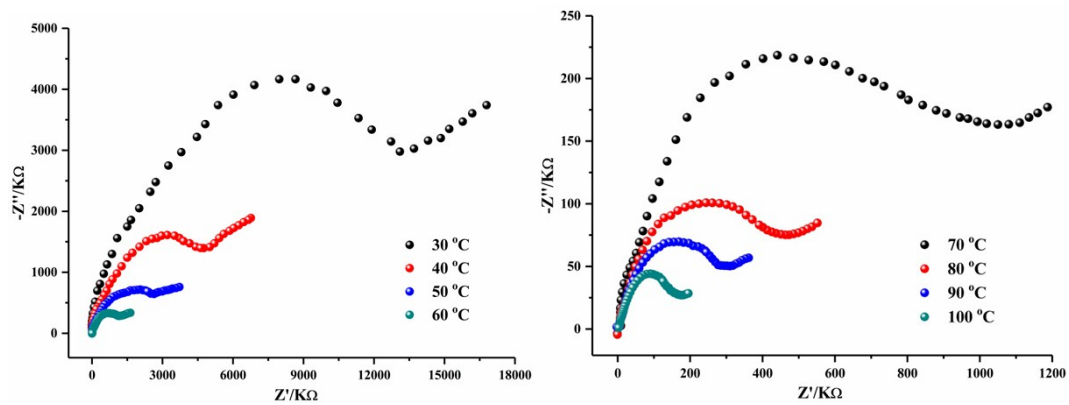

Fig. S8 Impedance spectra of **2** at 93% RH and 30-100 °C.

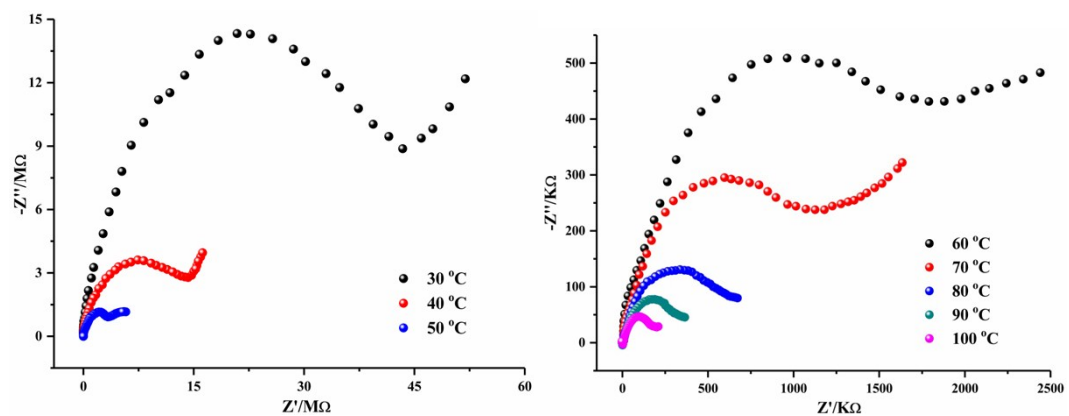

Fig. S9 Impedance spectra of **2** at 85% RH and 30-100 °C.

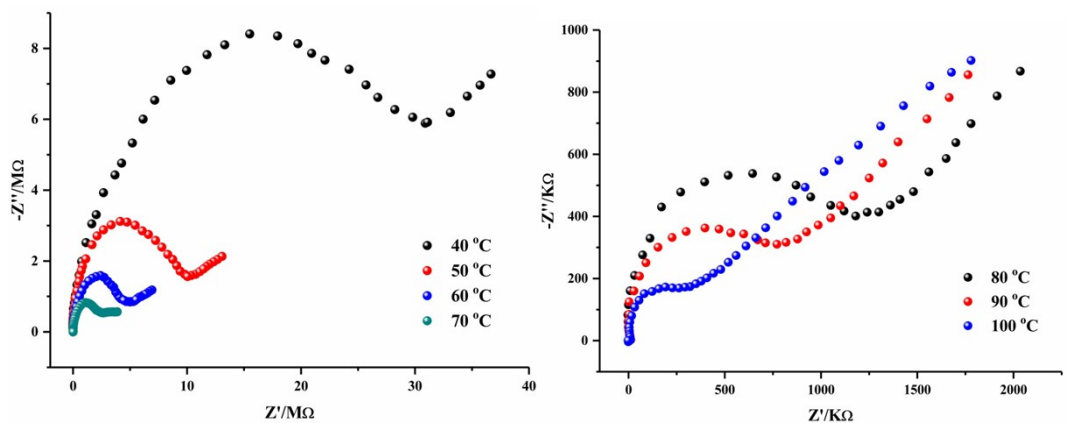

Fig. S10 Impedance spectra of **2** at 75% RH and 30-100 °C.



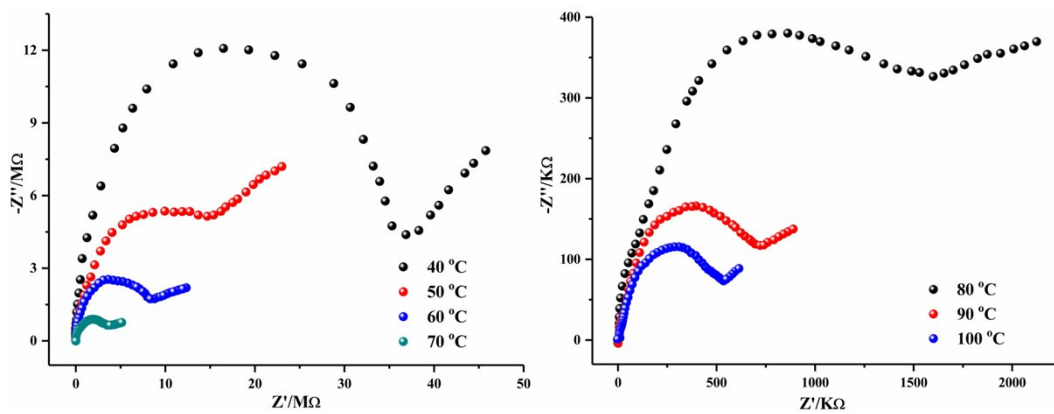

Fig. S11 Impedance spectra of 2 at 68% RH and 30-100 °C.

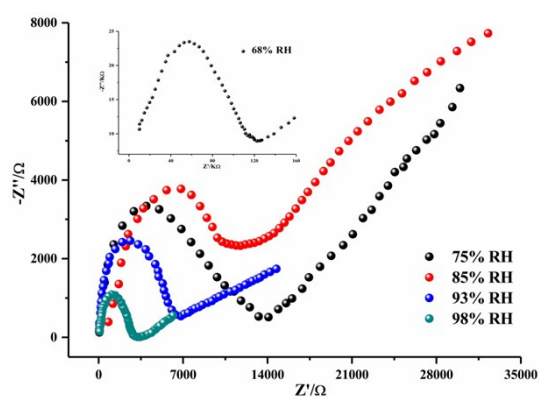

Fig. S12 Impedance spectra of 1 at 100 °C and different RHs.

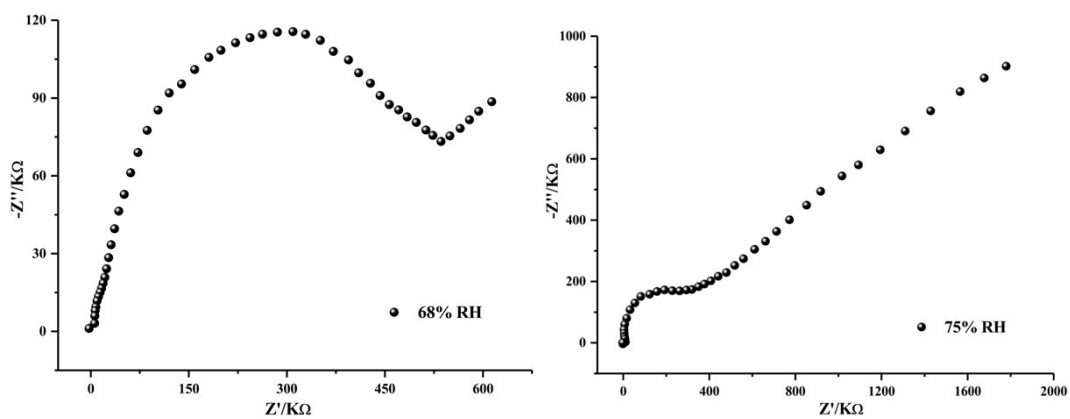

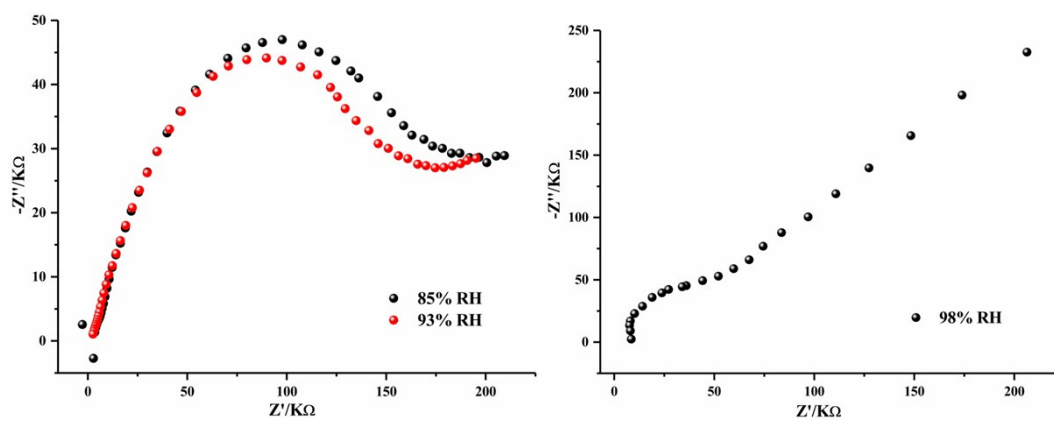

Fig. S13 Impedance spectra of **2** at 100 °C and different RHs.

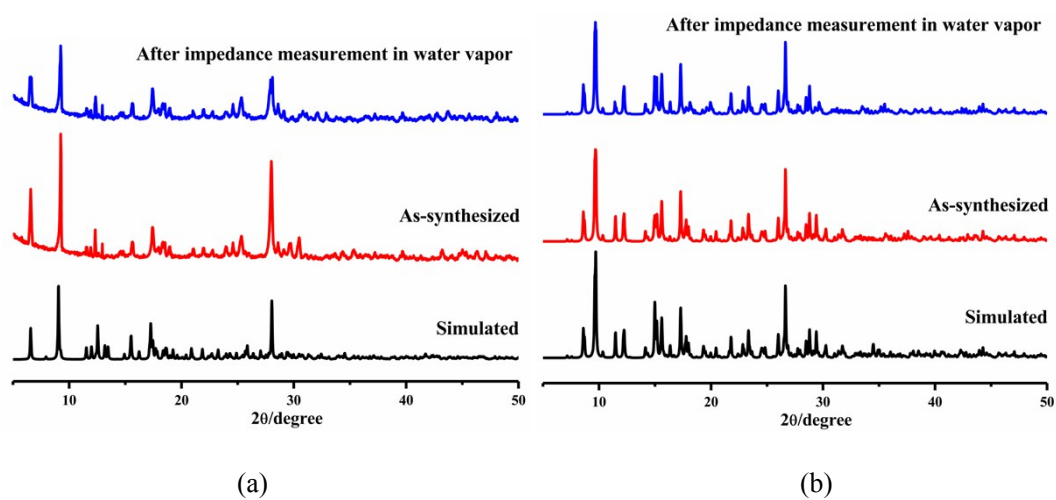

Fig. S14 PXRD patterns of **1** (a) and **2** (b): the simulated, as-synthesized and after electrochemical test
